# Supplementary material for: Thermal Assisted Oxygen Annealing for High Efficiency Planar CH3NH3PbI3 Perovskite Solar Cells
Source: PubMed Central journal article supplement (PMC4208060; doi:10.1038/srep06752), 2014-10-24
Supplement: srep06752-s1.pdf [file srep06752-s1.pdf]

[Supporting information]

**Thermal Assisted Oxygen Annealing for High Efficiency Planar CH<sub>3</sub>NH<sub>3</sub>PbI<sub>3</sub> Perovskite Solar Cells**

Zhiwei Ren<sup>1</sup>, Annie Ng<sup>1</sup>, Qian Shen<sup>1</sup>, Huseyin Cem Gokkaya<sup>1</sup>, Jingchuan Wang<sup>2</sup>, Lijun Yang<sup>2</sup>, Wai-Kin Yiu<sup>3</sup>, Gongxun Bai<sup>4</sup>, Aleksandra B. Djurišić<sup>3</sup>, Wallace Woon-fong Leung<sup>2</sup>, Jianhua Hao<sup>4</sup>, Wai Kin Chan<sup>5</sup> and Charles Surya<sup>1</sup>

<sup>1</sup>Department of Electronic and Information Engineering, The Hong Kong Polytechnic University, Hong Kong SAR

<sup>2</sup>Department of Mechanical Engineering, The Hong Kong Polytechnic University, Hong Kong SAR

<sup>3</sup>Department of Physics, The University of Hong Kong, Pokfulam, Hong Kong SAR

<sup>4</sup> Department of Applied Physics, The Hong Kong Polytechnic University, Hong Kong SAR

<sup>5</sup>Department of Chemistry, The University of Hong Kong, Pokfulam, Hong Kong SAR

Correspondence and requests for materials should be addressed to C.S.

([charles.surya@polyu.edu.hk](mailto:charles.surya@polyu.edu.hk))

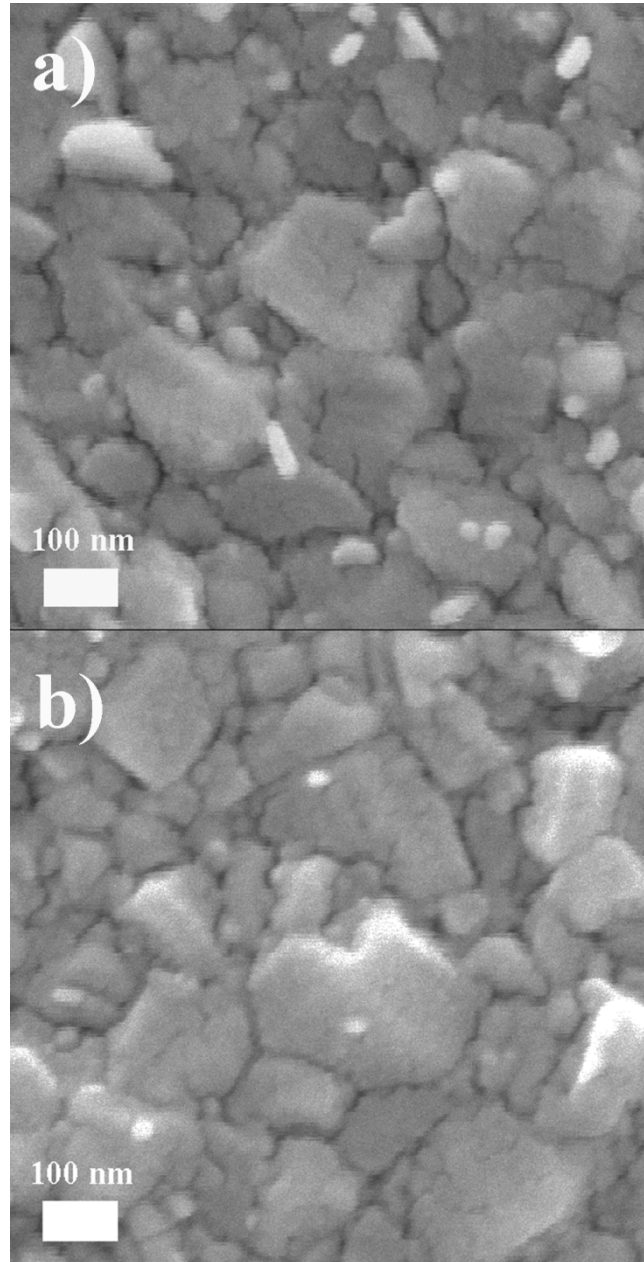

**Figure S1.** The SEM top-view image of the perovskite film before and after O<sub>2</sub> annealing process

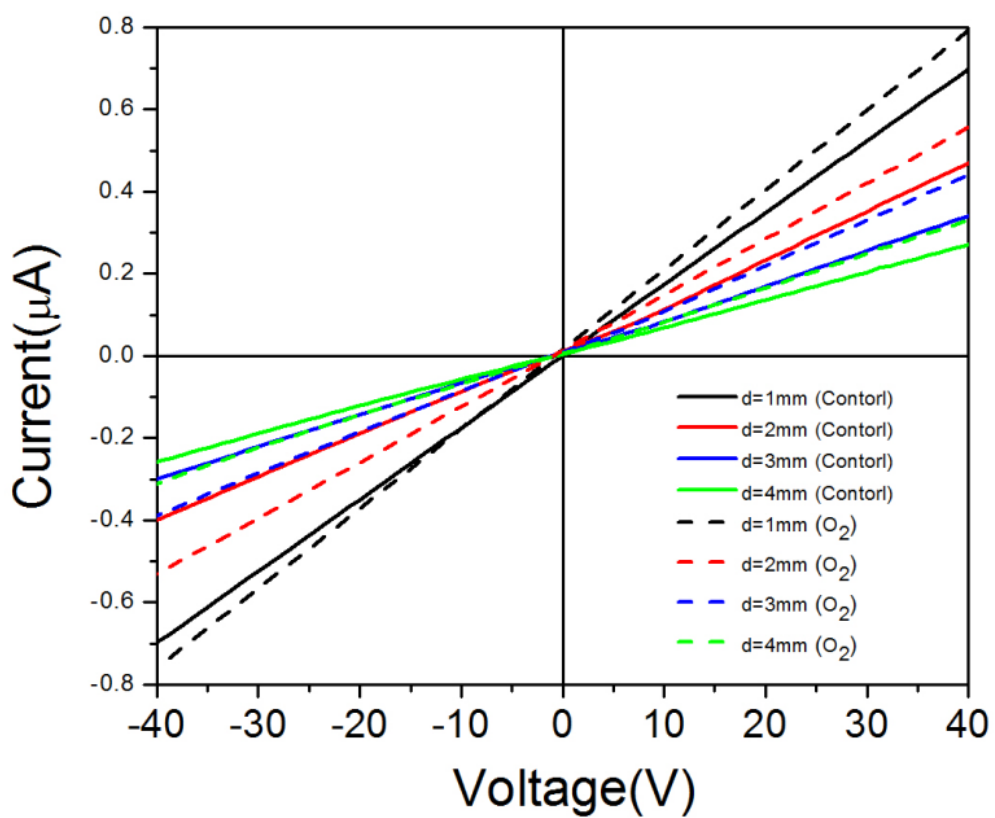

**Figure S2.** The *I-V* characteristics across the electrode with different separation on the film of spiro-MeOTAD before and after O<sub>2</sub> annealing
